# Supplementary material
Source: ML conference proceedings conference paper supplement (https://openreview.net/forum?id=Hu_4s88iqgc)
Supplement: supplementary_material [file attachment]

## Input

 $x$  $w_1$   
 $w_2$   
 $w_3$   
 $\vdots$   
 $w_{i-1}$   
 $w_i$   
 $w_{i+1}$   
 $\vdots$   
 $w_n$ 

## Randomized substitution

Embedding  
space

WordNet

synonym  
set $\hat{w}_i^1$   
 $\hat{w}_i^2$   
 $\hat{w}_i^3$   
 $\vdots$   
 $\hat{w}_i^d$ 

converted texts

 $x_1$  $\hat{w}_1^1$   
 $w_2$   
 $\hat{w}_3^2$   
 $\vdots$   
 $\hat{w}_{i-1}^3$   
 $\hat{w}_i^d$   
 $w_{i+1}$   
 $\vdots$   
 $\hat{w}_n^d$  $x_2$  $w_1$   
 $\hat{w}_2^1$   
 $\hat{w}_3^2$   
 $\vdots$   
 $\hat{w}_{i-1}^d$   
 $\hat{w}_i^3$   
 $\hat{w}_{i+1}^3$   
 $\vdots$   
 $w_n$  $x_3$  $\hat{w}_1^2$   
 $\hat{w}_2^3$   
 $w_3$   
 $\vdots$   
 $\hat{w}_{i-1}^1$   
 $\hat{w}_i^d$   
 $\hat{w}_{i+1}^1$   
 $\vdots$   
 $\hat{w}_n^3$  $x_k$  $\hat{w}_1^d$   
 $w_2$   
 $\hat{w}_3^1$   
 $\vdots$   
 $\hat{w}_{i-1}^3$   
 $\hat{w}_i^2$   
 $w_{i+1}$   
 $\vdots$   
 $\hat{w}_n^2$ 

## Query

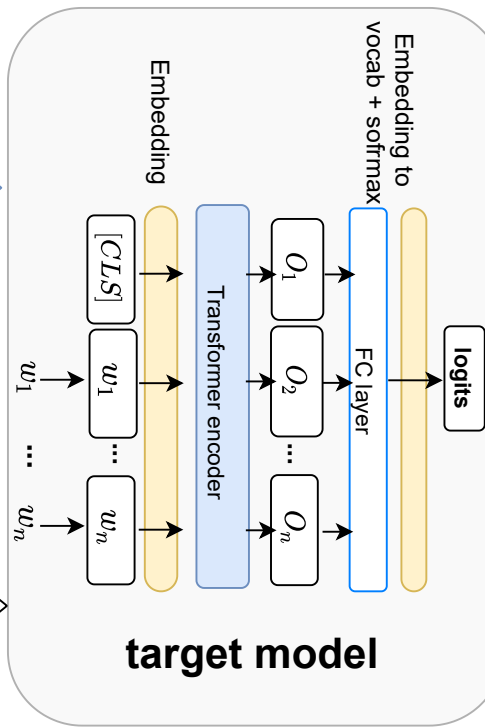

## Vote & Detection

 $f(x_1)$  $f(x_2)$  $f(x_3)$  $\vdots$  $f(x_k)$ 

$$\operatorname{argmax} \sum_{i=1}^k f(x_i)$$

RS&amp;V label

adversarial  
if unequal $f(x)$ 

logits

$$\operatorname{argmax} f(x)$$

original label
